# Supplementary material
Source: Springer Nature journal article supplement (https://www.springermedizin.de/resource/supplementary/12865_2008_214_MOESM5_ESM.pdf/9428754)

A

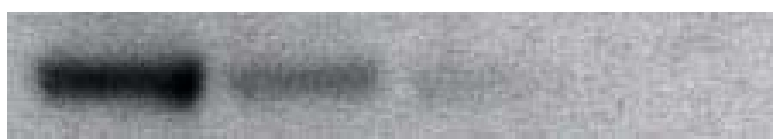

IRAK-1 81 kDa

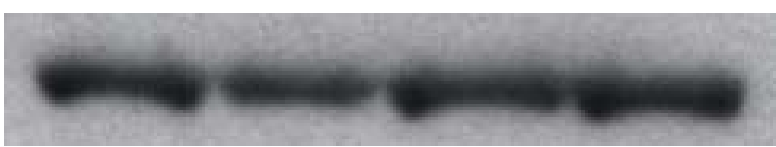

Actin 42 kDa

0/0      0/LPS      LPS/0      LPS/LPS

B

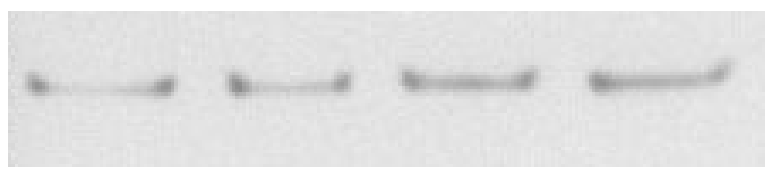

SHIP 145 kDa

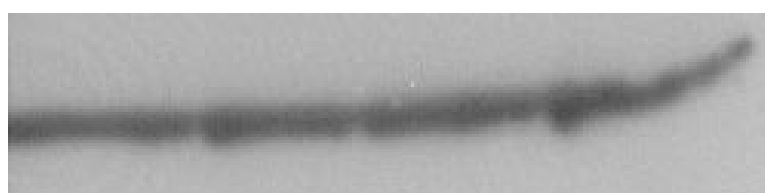

Actin 42 kDa

0/0      0/LPS      LPS/0      LPS/LPS

Supplement: MOESM5 [file 9428754]
